# Supplementary material for: Serum neurofilament light-chain levels and long-term treatment outcomes in relapsing-remitting multiple sclerosis patients: A post hoc analysis of the randomized CombiRx trial
Source: PubMed Central journal article supplement — Mult Scler J Exp Transl Clin. 2023 Apr 27;9(2):20552173231169463. doi: 10.1177/20552173231169463 (PMC10150429; doi:10.1177/20552173231169463), 2023-04-27

**Supplemental Figure 1.** Unadjusted serum neurofilament light-chain (sNfL) levels for individual patients at baseline, month 6, month 12, and month 36 in the (a) intramuscular (IM) interferon (IFN) beta-1a, (b) glatiramer acetate (GA), and (c) IM IFN beta-1a + GA treatment groups.

Elapsed time not shown to scale.

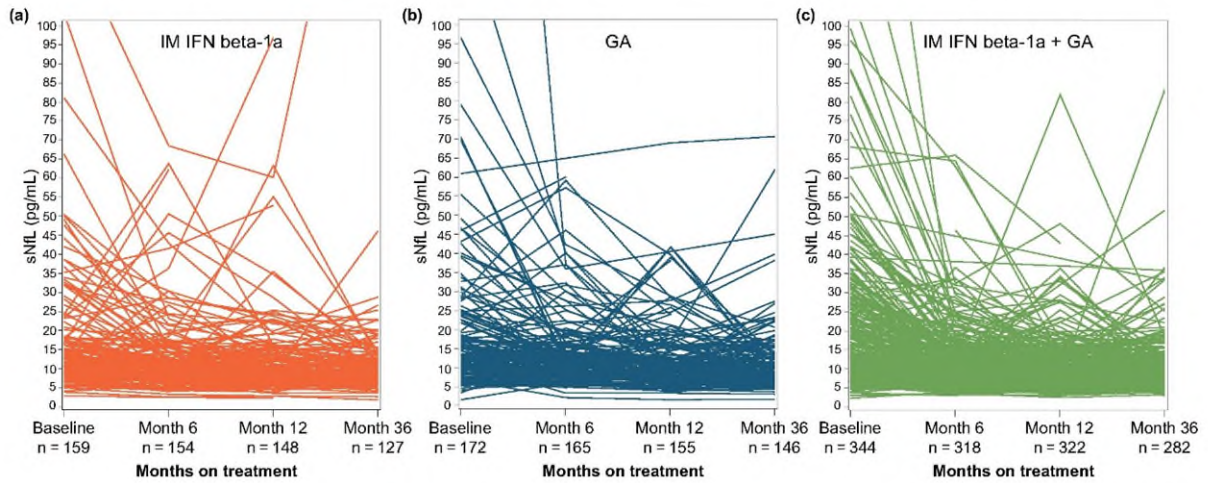

Supplement: sj-pdf-1-mso-10.1177_20552173231169463.pdf [file sj-pdf-1-mso-10.1177_20552173231169463.pdf]
